# Supplementary material
Source: PubMed Central journal article supplement (PMC4446425)

A

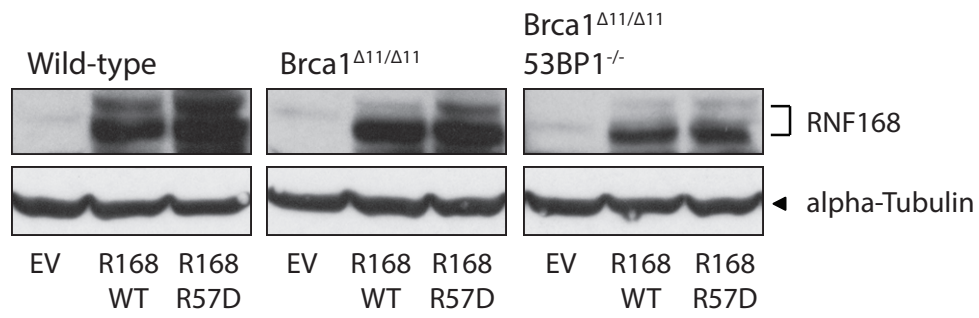

B

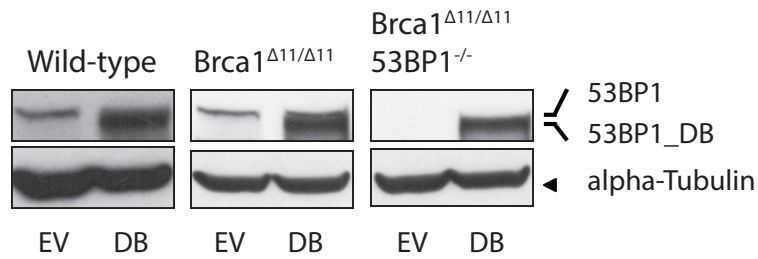

C

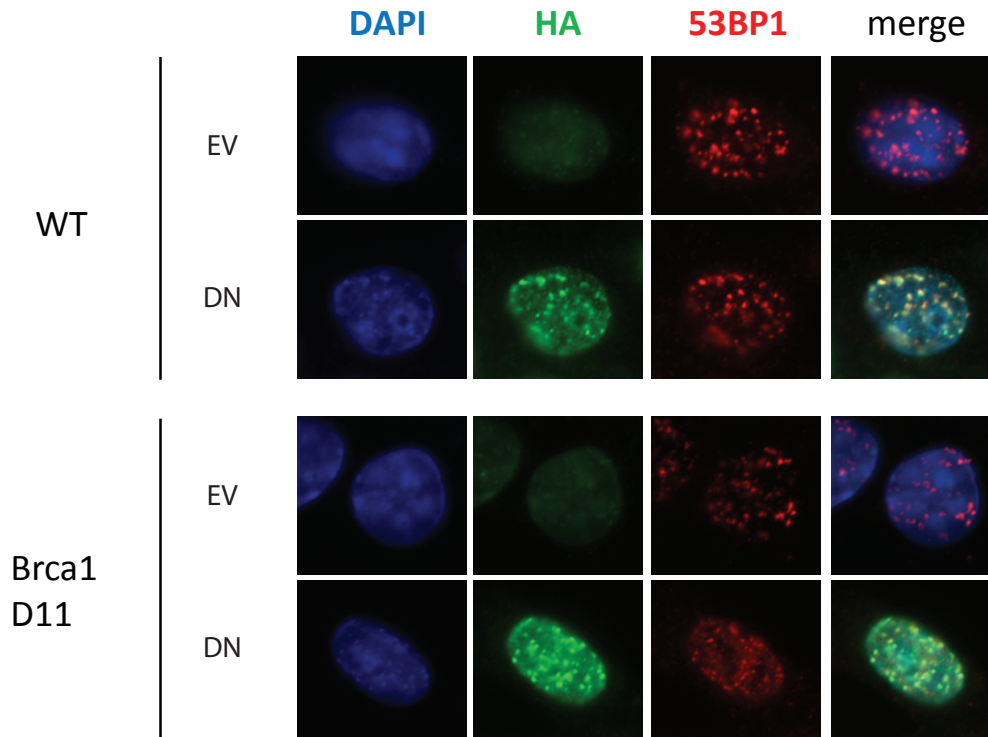

D

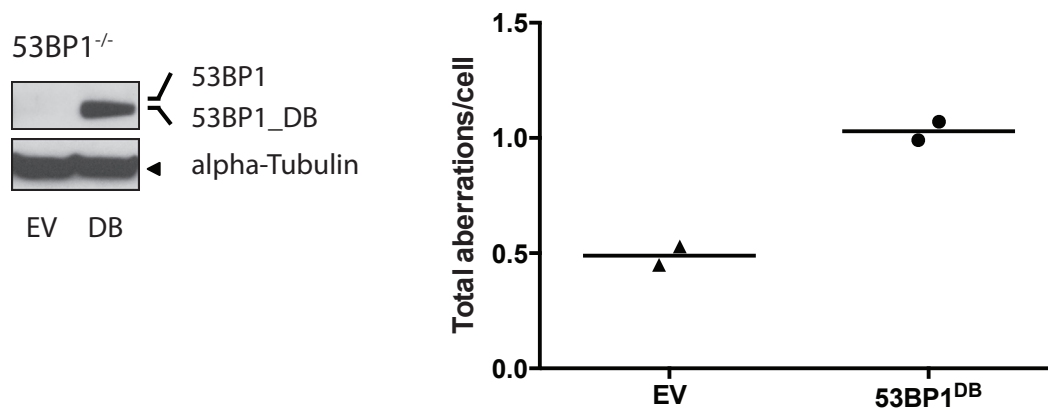

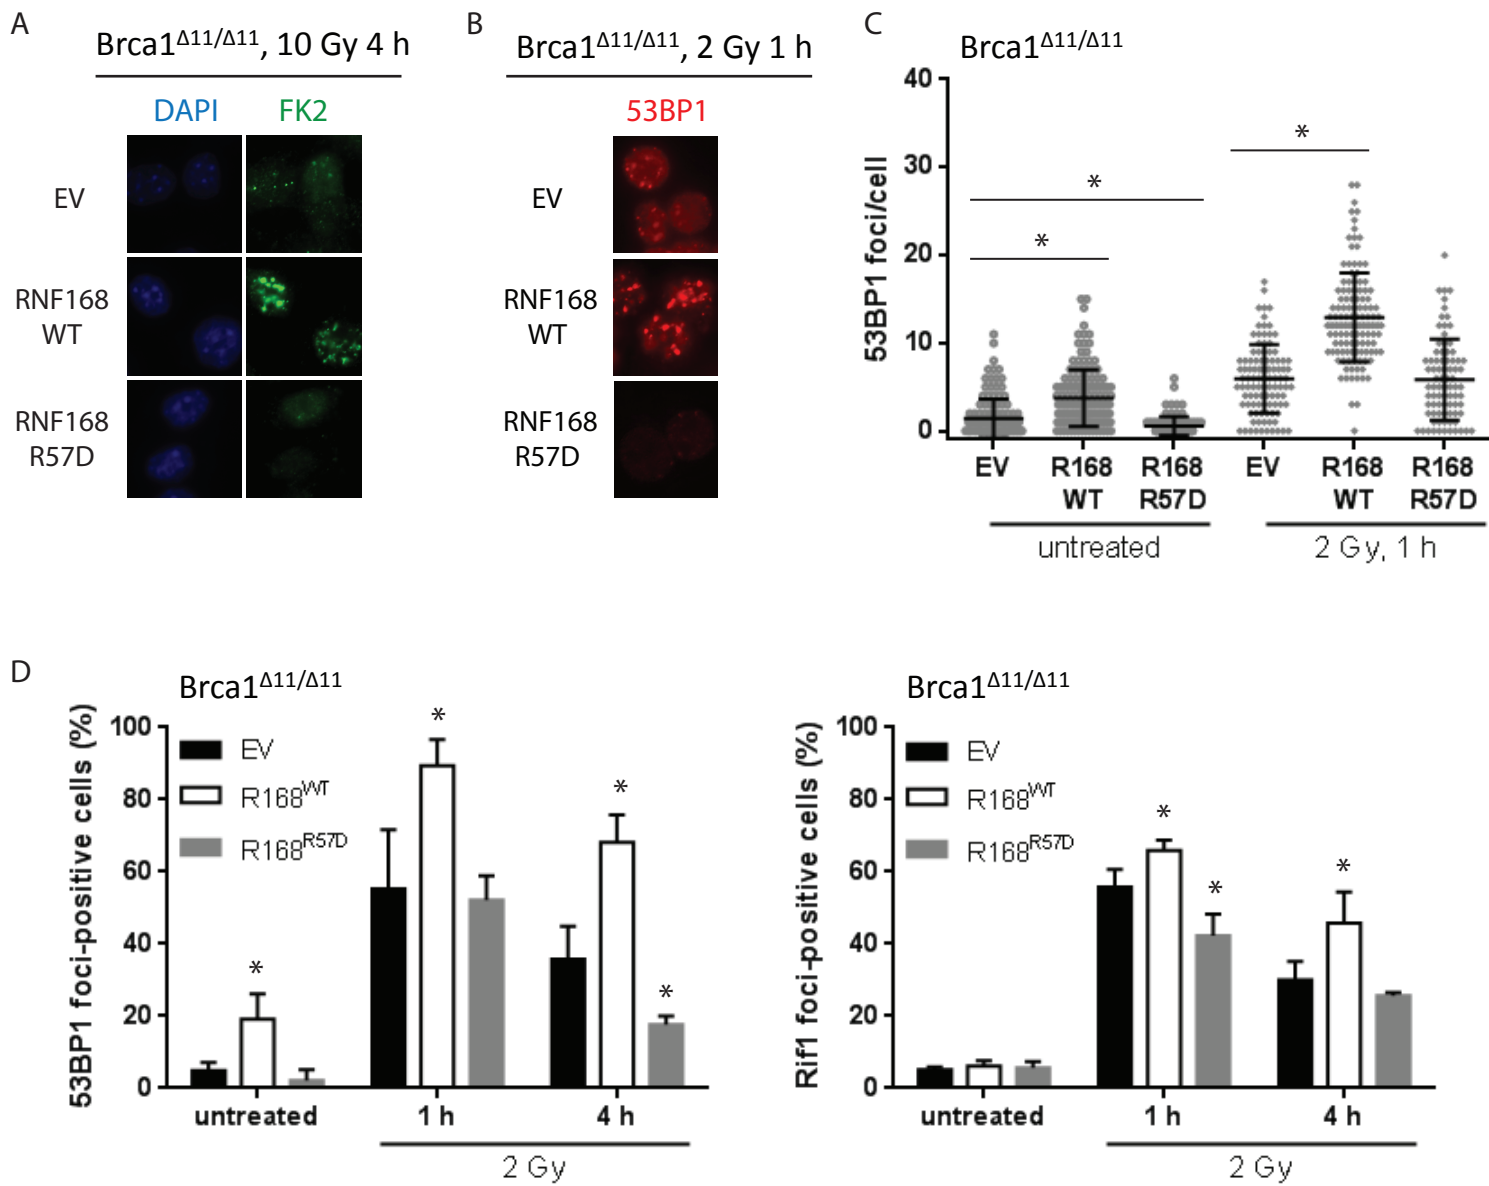

A

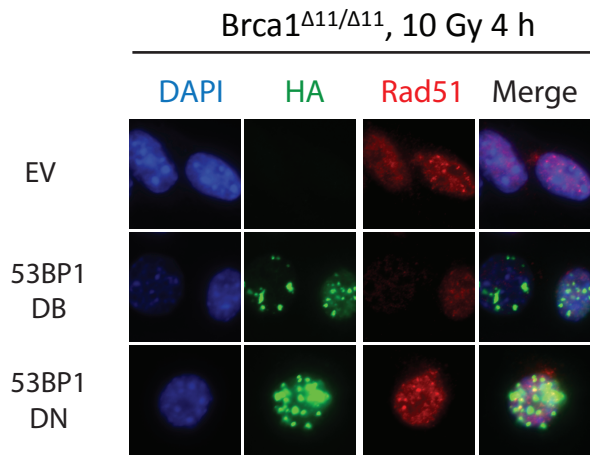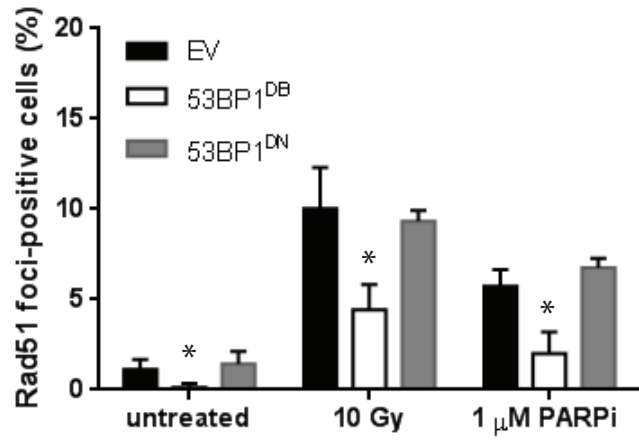

B

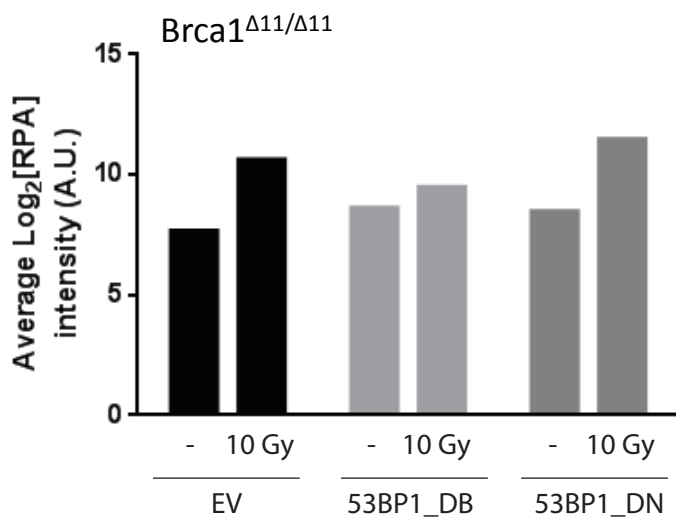

C

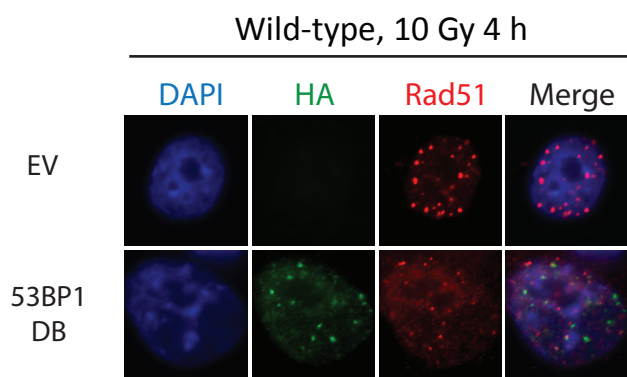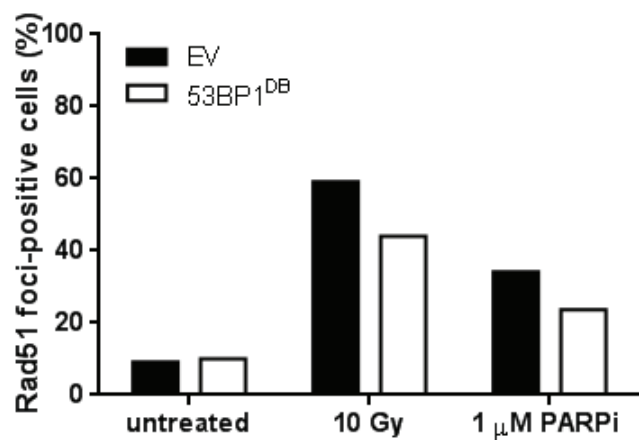

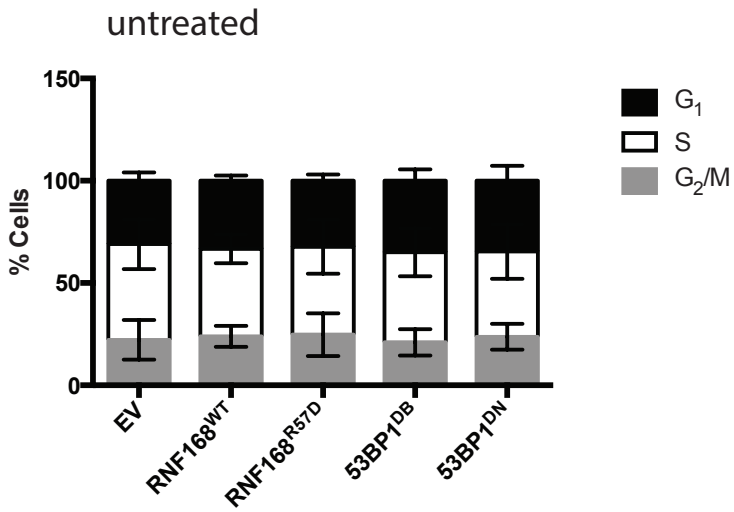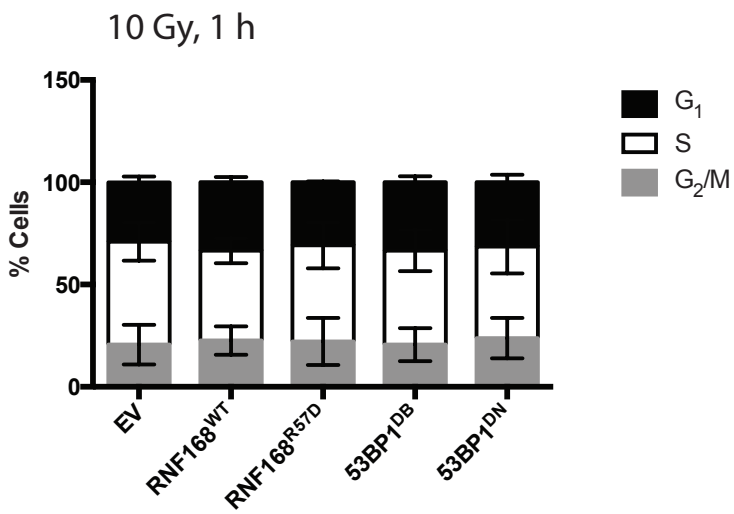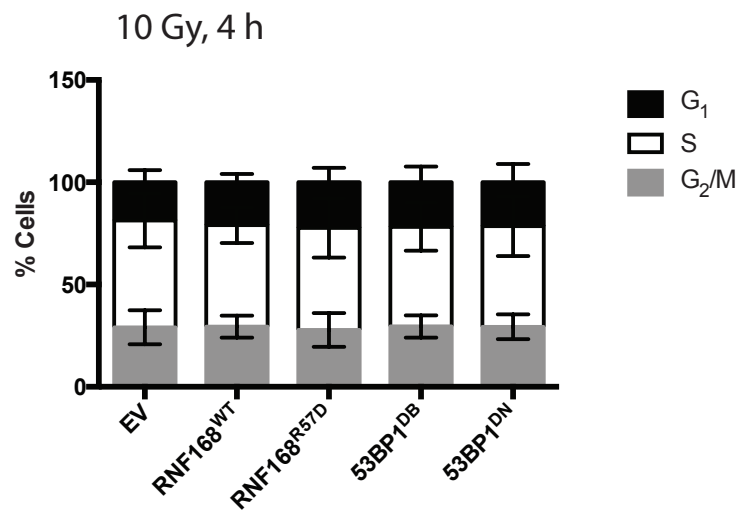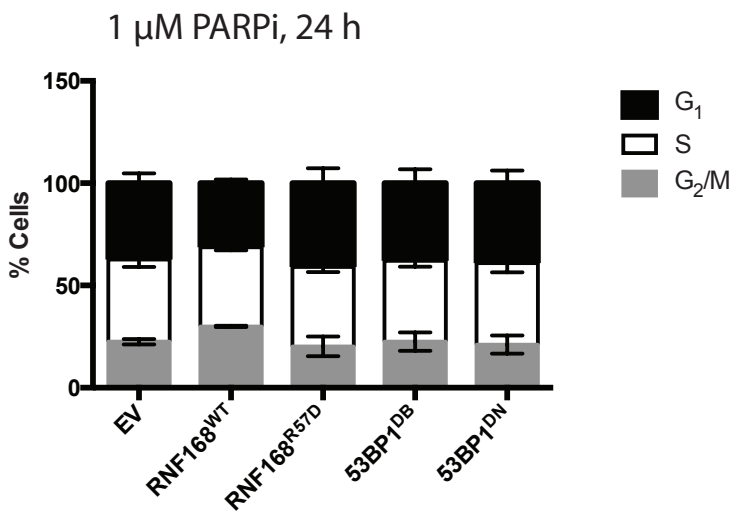

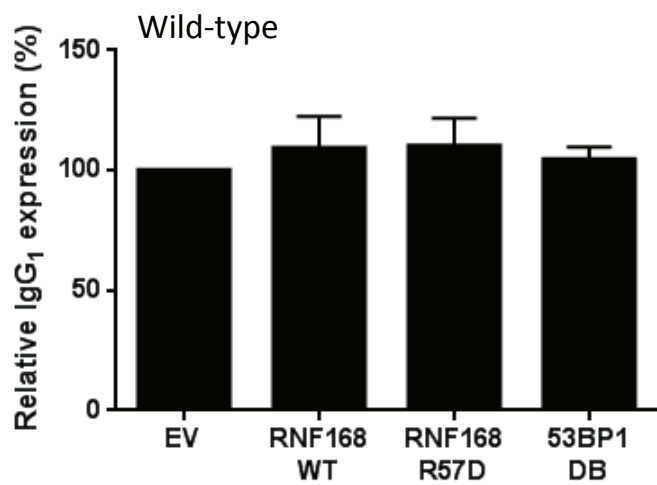

Supplement: supp_gkv336_nar-00554-d-2015-File010.pdf [file supp_gkv336_nar-00554-d-2015-File010.pdf]
